# Supplementary material for: Colorimetric detection of Hg2+ with an azulene-containing chemodosimeter via dithioacetal hydrolysis
Source: Royal Society of Chemistry journal article supplement (doi:10.1039/d0an01404d), 2020-01-01
Supplement: d0an01404d1.pdf [file d0an01404d1.pdf]

# Colorimetric Detection of Hg<sup>2+</sup> with an Azulene- Containing Chemodosimeter via Dithioacetal Hydrolysis

Carlos M. López-Alled, Lloyd C. Murfin, Gabriele Kociok-Köhn, Tony D. James,\* Jannis Wenk\* and  
Simon E. Lewis.\*

## ELECTRONIC SUPPLEMENTARY INFORMATION

|                                                       |    |
|-------------------------------------------------------|----|
| General Details .....                                 | 2  |
| Synthesis of 2-(azulen-1-yl)-1,3-dithiolane (3) ..... | 2  |
| Limit of Detection .....                              | 3  |
| Fluorescence data.....                                | 3  |
| NMR spectra of 3 .....                                | 4  |
| X-ray crystallographic data for 3.....                | 7  |
| References .....                                      | 11 |

## General Details

Reactions were carried out under an atmosphere of N<sub>2</sub>, through the use of a Schlenk line. Anhydrous dichloromethane was purified through anhydrous alumina columns using an Innovative Technology Inc. PS-400-7 solvent purification system. Solvent was deoxygenated by channelling a stream of N<sub>2</sub> through the liquid (sparging). "Pet" refers to petroleum ether (boiling point 40-60 °C). Thin layer chromatography (TLC) was carried out on aluminium plates coated with silica gel (Alugram®SIL G/UV 254 nm), and visualisation was achieved by the naked eye (for coloured azulene compounds) and with UV light. Solvents were removed using Büchi rotary evaporators and with high vacuum on a Schlenk line. Flash column chromatography was carried out using Davisil LC 60 Å silica gel (35-70 micron) purchased from Sigma-Aldrich. NMR spectra were run in CDCl<sub>3</sub> unless otherwise stated, on an Agilent A500a instrument. IR spectra were recorded on a Perkin-Elmer 1600 FT-IR instrument. Capillary melting points were recorded on a Büchi 535 melting point apparatus and are uncorrected. High resolution mass spectrometry (HRMS) was carried out using a micrOTOF ESI-TOF spectrometer coupled to an Agilent 1200 LC system for autosampling. X-ray crystallography was carried out on a Nonius Kappa CCD diffractometer with Mo-K $\alpha$  radiation ( $\lambda = 0.71073 \text{ \AA}$ ).

## Synthesis of 2-(azulen-1-yl)-1,3-dithiolane (3)

Under an atmosphere of nitrogen, azulene-1-carbaldehyde **2** (13 mg, 0.083 mmol, 1.0 eq., prepared as described previously)<sup>1</sup> was dissolved in CH<sub>2</sub>Cl<sub>2</sub> (10 mL) and combined with 4 Å molecular sieves, into which BF<sub>3</sub>·Et<sub>2</sub>O (5  $\mu$ L, 0.04 mmol, 0.5 eq.) and ethane-1,2-dithiol (13  $\mu$ L, 0.166 mmol, 2.0 eq.) were added. The mixture was stirred for 28 hours at room temperature, after which saturated Na<sub>2</sub>CO<sub>3(aq)</sub> (10 mL) was added. The mixture was extracted with CH<sub>2</sub>Cl<sub>2</sub> (3  $\times$  20 mL), and the organic phase was dried over MgSO<sub>4</sub>, filtered, then concentrated under reduced pressure to give a blue solid. The crude was purified *via* silica column chromatography (petroleum ether/ ethyl acetate, 80:20, v/v) to give **3** (12.5 mg, 65 %, R<sub>f</sub> = 0.60) as a blue solid and unreacted **2** (3.5 mg, 27%) as a red solid. <sup>1</sup>H-NMR (500 MHz, CDCl<sub>3</sub>)  $\delta$  = 8.48 (d, *J* = 9.8 Hz, 1H), 8.28 (d, *J* = 9.8 Hz, 1H), 8.19 (d, *J* = 4.0 Hz, 1H), 7.59 (t, *J* = 9.8 Hz, 1H), 7.34 (d, *J* = 3.9 Hz, 1H), 7.21 (t, *J* = 9.8 Hz, 1H), 7.16 (t, *J* = 9.8 Hz, 1H), 6.46 (s, 1H), 3.65-3.59 (m, 2H), 3.48-3.41 (m, 2H) ppm; <sup>13</sup>C-NMR (126 MHz, CDCl<sub>3</sub>)  $\delta$  = 142.07, 137.86, 137.17, 136.87, 135.46, 133.27, 126.32, 123.57, 122.70, 117.32, 49.64, 40.18 ppm; IR:  $\nu$  = 2923, 2903, 1574, 1455, 1434, 1412, 1391, 1303, 1273, 1247, 1191, 966, 948, 789, 751, 728, 696, 675 cm<sup>-1</sup>. HRMS (-ve ESI) calculated mass: [M-H]<sup>+</sup> = 233.0453, observed mass: [M-H]<sup>+</sup> = 233.0457; m. pt. 103.5-106.5 °C.

## Limit of Detection

UV-Vis limit of detection (LOD) was calculated using Equation S1.<sup>2</sup>

$$LOD = \frac{3\sigma}{m} \quad (S1)$$

Where  $\sigma$  is the standard deviation of the blank and  $m$  is the gradient of the line of best fit.

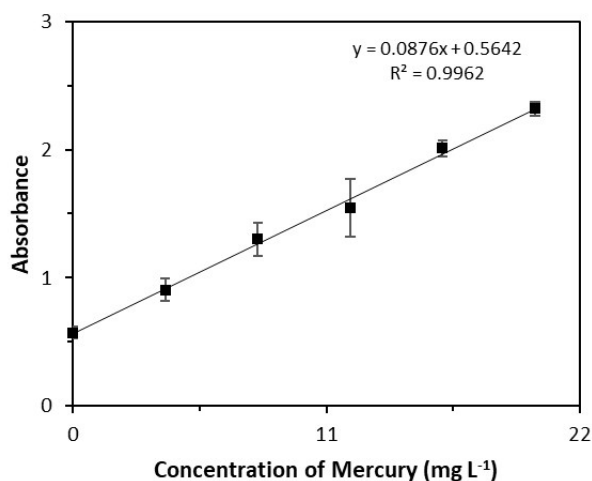

**Figure S1.** LOD of **3** (100  $\mu\text{M}$ ) with NaOH (1 mM) to  $\text{Hg}(\text{NO}_3)_2$  in MeCN/  $\text{H}_2\text{O}$  (2:8, v/v) determined by UV-vis absorption at  $\lambda_{\text{max}} = 307 \text{ nm}$ , calculated to be 1.65  $\text{mg L}^{-1}$  using Equation S1. Displayed errors calculated by standard deviation ( $n = 3$ ). Incubation time 30 min.

## Fluorescence data

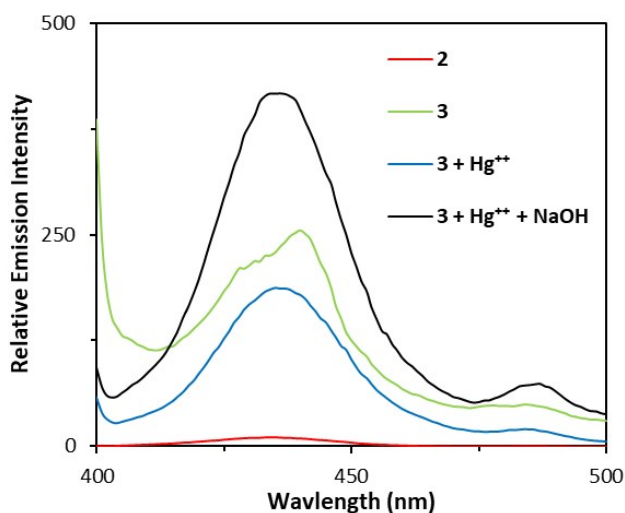

**Figure S2.** Comparison of fluorescence emission spectra of **2** (500  $\mu\text{M}$ ), **3** (500  $\mu\text{M}$ ), **3** (500  $\mu\text{M}$ ) +  $\text{Hg}(\text{NO}_3)_2$  (500  $\mu\text{M}$ ), and **3** (500  $\mu\text{M}$ ) +  $\text{Hg}(\text{NO}_3)_2$  (500  $\mu\text{M}$ ) + NaOH (10 mM) in MeCN/ $\text{H}_2\text{O}$  (2:8, v/v). Fluorescence intensities were measured with  $\lambda_{\text{ex}} = 375 \text{ nm}$  (ex. slit 20, em. slit 20) nm on an Agilent Technologies Cary Eclipse Fluorescence Spectrometer.

# NMR spectra of 3

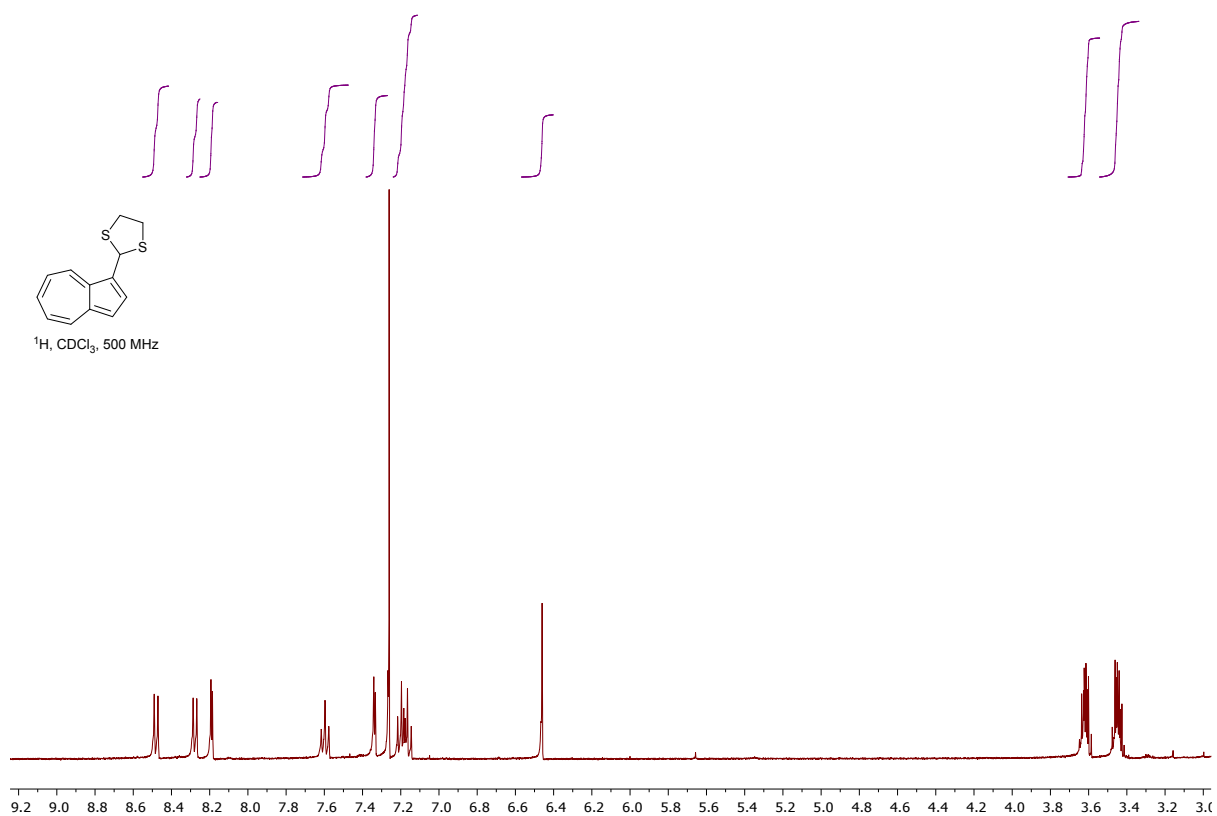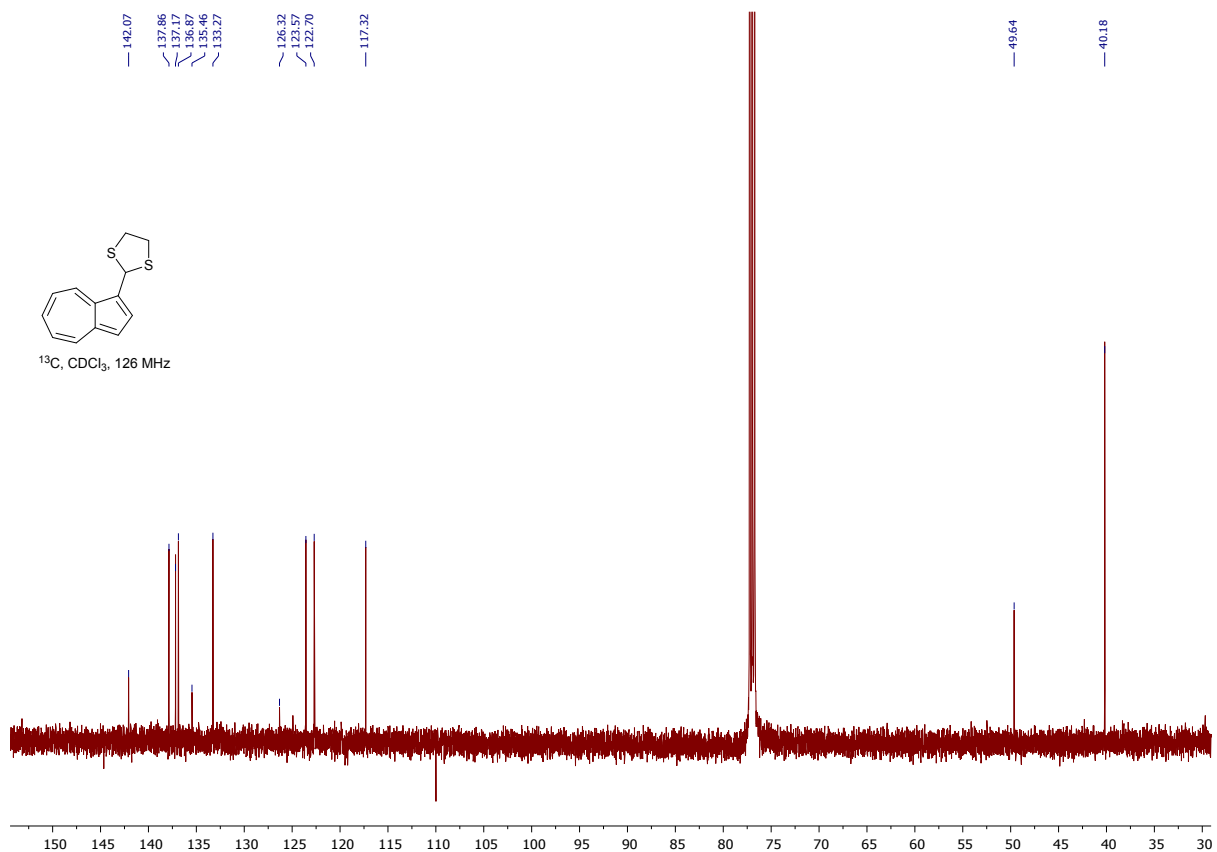

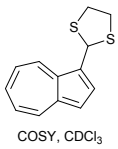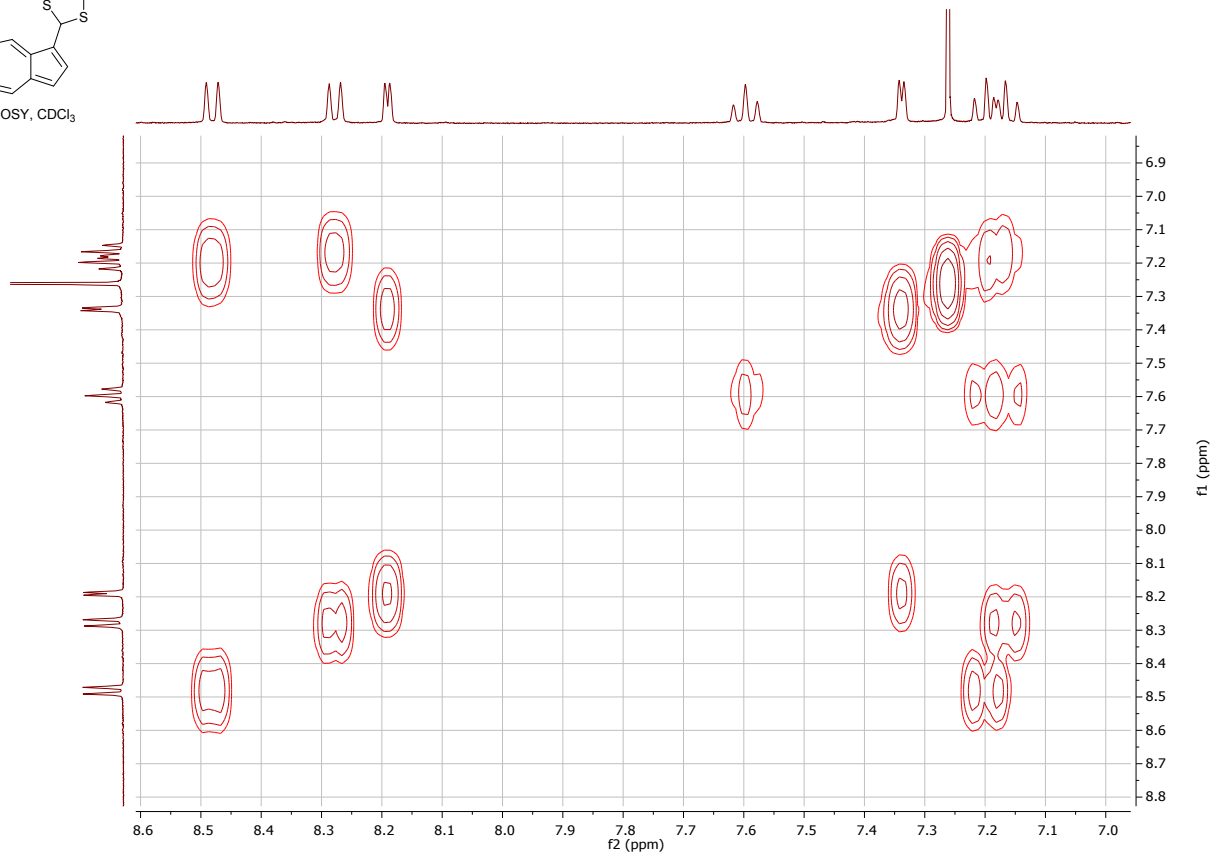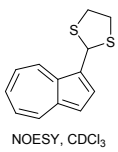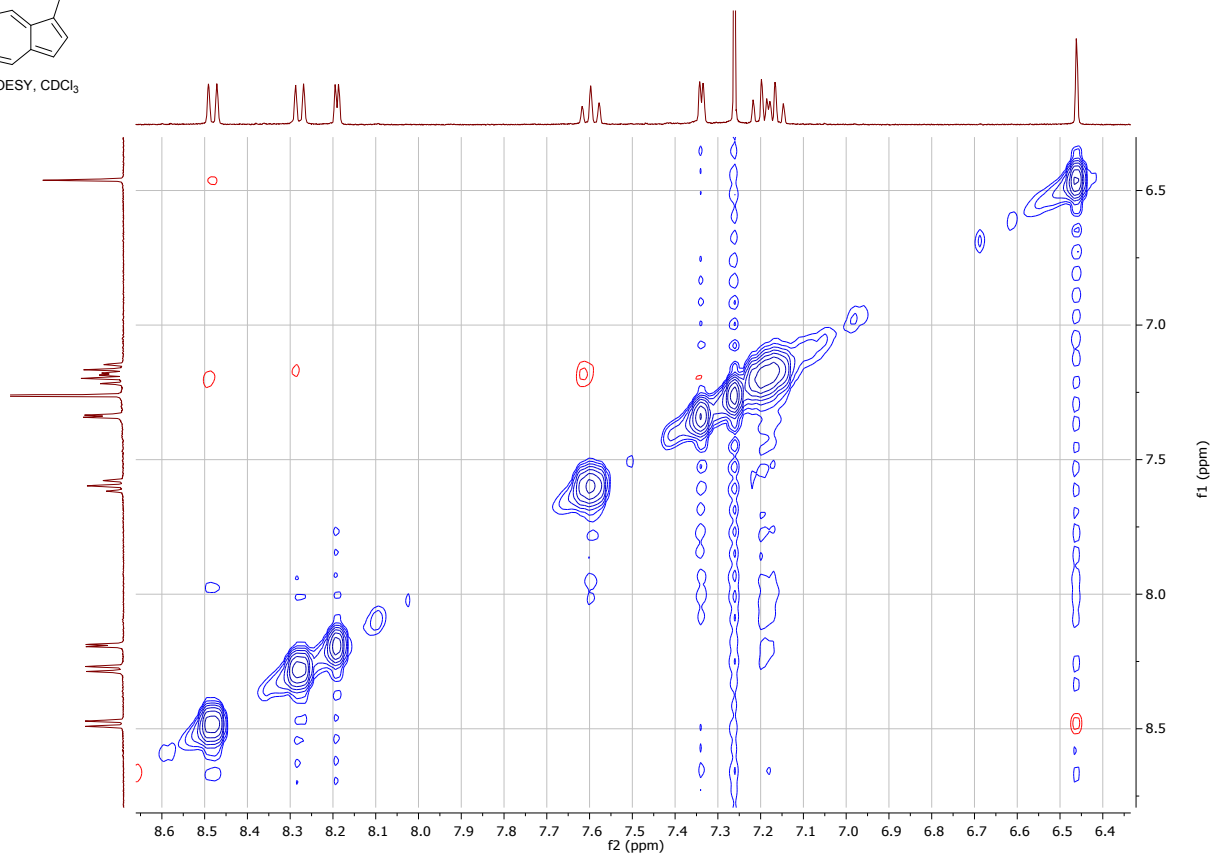

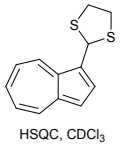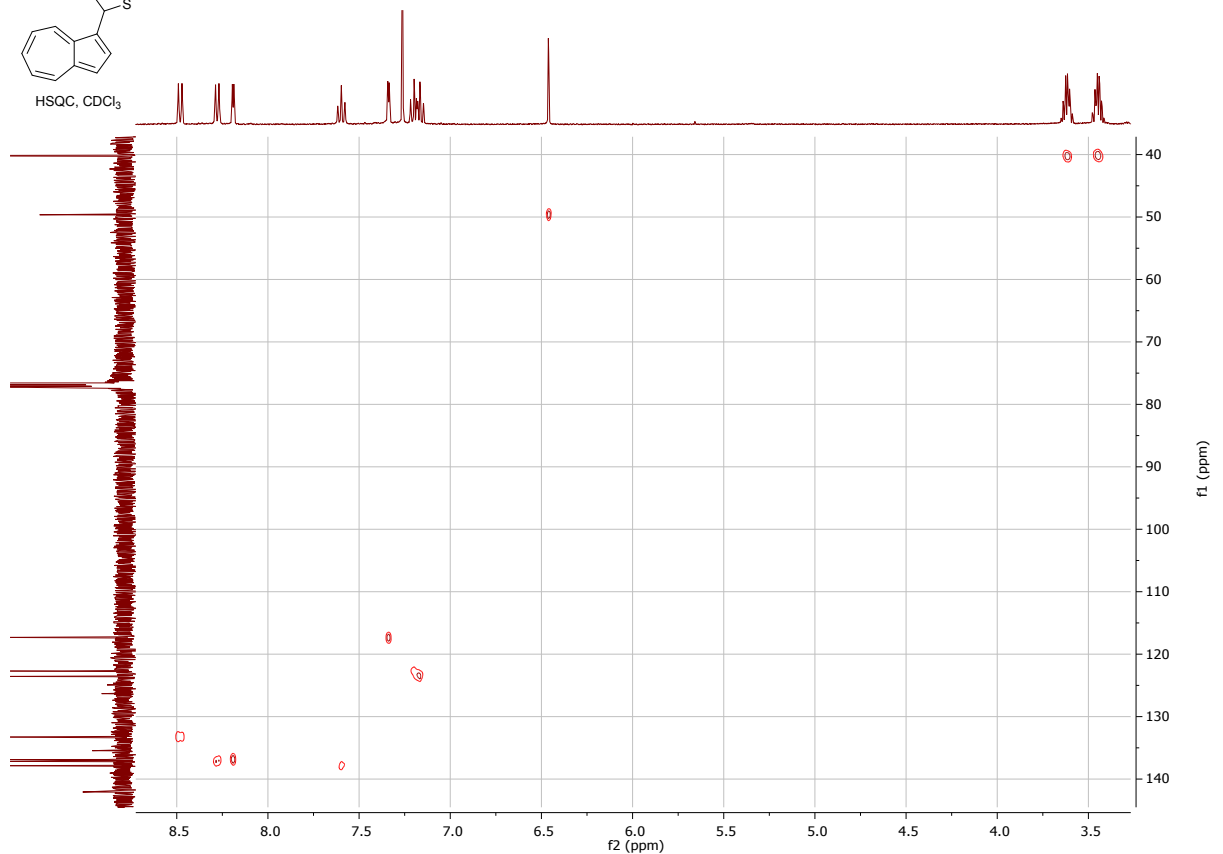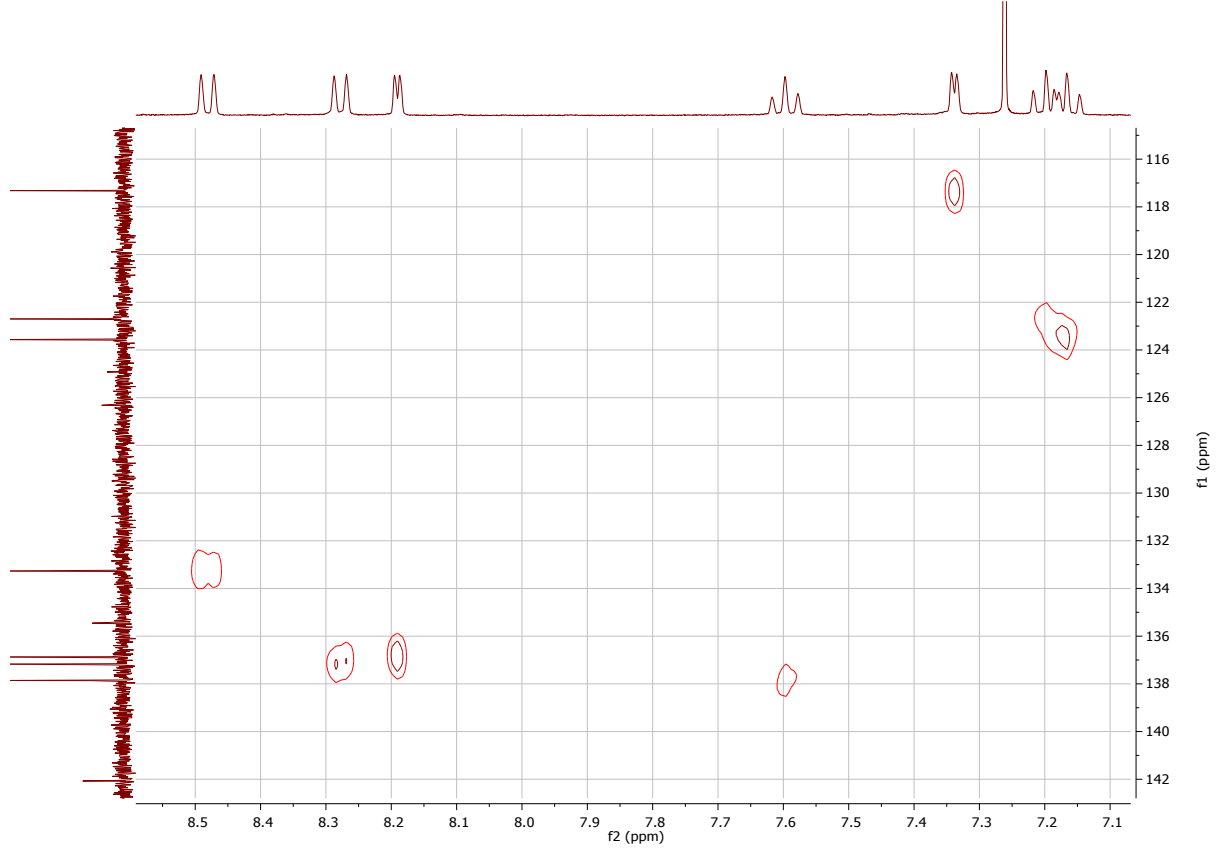

### X-ray crystallographic data for 3

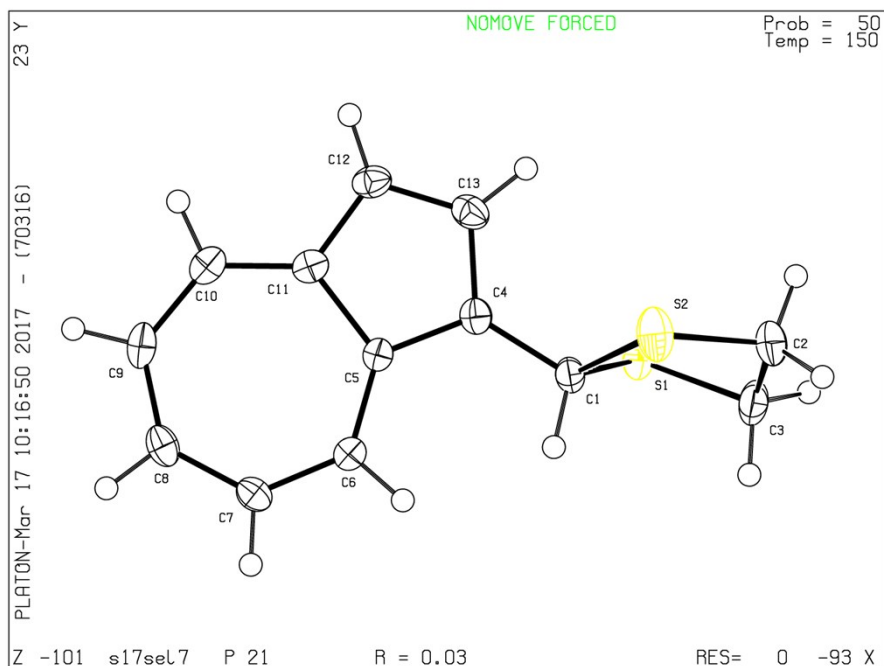

**Table S1. Crystal data and structure refinement for 3.**

|                                   |                                                |                  |
|-----------------------------------|------------------------------------------------|------------------|
| CCDC code                         | 1958284                                        |                  |
| Empirical formula                 | C <sub>13</sub> H <sub>12</sub> S <sub>2</sub> |                  |
| Formula weight                    | 232.35                                         |                  |
| Temperature                       | 150.00(10) K                                   |                  |
| Wavelength                        | 1.54184 Å                                      |                  |
| Crystal system                    | Monoclinic                                     |                  |
| Space group                       | P2 <sub>1</sub>                                |                  |
| Unit cell dimensions              | a = 6.0305(2) Å                                | α = 90°.         |
|                                   | b = 7.7775(2) Å                                | β = 101.799(3)°. |
|                                   | c = 12.0577(4) Å                               | γ = 90°.         |
| Volume                            | 553.58(3) Å <sup>3</sup>                       |                  |
| Z                                 | 2                                              |                  |
| Density (calculated)              | 1.394 Mg/m <sup>3</sup>                        |                  |
| Absorption coefficient            | 4.016 mm <sup>-1</sup>                         |                  |
| F(000)                            | 244                                            |                  |
| Crystal size                      | 0.300 x 0.100 x 0.030 mm <sup>3</sup>          |                  |
| Theta range for data collection   | 3.745 to 72.961°.                              |                  |
| Index ranges                      | -7 ≤ h ≤ 4, -9 ≤ k ≤ 9, -14 ≤ l ≤ 14           |                  |
| Reflections collected             | 3962                                           |                  |
| Independent reflections           | 2126 [R(int) = 0.0308]                         |                  |
| Completeness to theta = 67.684°   | 100.0 %                                        |                  |
| Absorption correction             | Semi-empirical from equivalents                |                  |
| Max. and min. transmission        | 1.00000 and 0.64349                            |                  |
| Refinement method                 | Full-matrix least-squares on F <sup>2</sup>    |                  |
| Data / restraints / parameters    | 2126 / 1 / 136                                 |                  |
| Goodness-of-fit on F <sup>2</sup> | 1.033                                          |                  |
| Final R indices [I > 2σ(I)]       | R1 = 0.0338, wR2 = 0.0887                      |                  |

|                              |                                    |
|------------------------------|------------------------------------|
| R indices (all data)         | R1 = 0.0344, wR2 = 0.0894          |
| Absolute structure parameter | -0.03(2)                           |
| Extinction coefficient       | n/a                                |
| Largest diff. peak and hole  | 0.221 and -0.197 e.Å <sup>-3</sup> |

**Table S2.** Atomic coordinates ( x 10<sup>4</sup>) and equivalent isotropic displacement parameters (Å<sup>2</sup>x 10<sup>3</sup>) for **3**. U(eq) is defined as one third of the trace of the orthogonalized U<sup>ij</sup> tensor.

|       | x       | y       | z        | U(eq) |
|-------|---------|---------|----------|-------|
| S(1)  | 1400(1) | 3398(1) | 8685(1)  | 23(1) |
| S(2)  | 3792(2) | 6700(1) | 8807(1)  | 35(1) |
| C(1)  | 2026(5) | 5182(4) | 7823(2)  | 21(1) |
| C(2)  | 3085(6) | 5935(5) | 10116(3) | 32(1) |
| C(3)  | 1013(6) | 4776(5) | 9830(3)  | 32(1) |
| C(4)  | 3204(5) | 4575(4) | 6920(3)  | 20(1) |
| C(5)  | 2315(5) | 4571(4) | 5741(2)  | 17(1) |
| C(6)  | 251(5)  | 5235(4) | 5185(3)  | 19(1) |
| C(7)  | -685(5) | 5237(4) | 4025(3)  | 22(1) |
| C(8)  | 210(6)  | 4580(4) | 3134(3)  | 24(1) |
| C(9)  | 2247(6) | 3757(4) | 3148(3)  | 26(1) |
| C(10) | 3973(5) | 3380(5) | 4076(3)  | 23(1) |
| C(11) | 4068(5) | 3718(4) | 5210(3)  | 20(1) |
| C(12) | 5878(5) | 3286(5) | 6099(3)  | 24(1) |
| C(13) | 5352(5) | 3801(4) | 7114(3)  | 24(1) |

**Table S3.** Bond lengths [Å] for **3**.

|            |          |
|------------|----------|
| S(1)-C(3)  | 1.801(4) |
| S(1)-C(1)  | 1.818(3) |
| S(2)-C(2)  | 1.818(4) |
| S(2)-C(1)  | 1.849(3) |
| C(1)-C(4)  | 1.493(4) |
| C(1)-H(1)  | 1.0000   |
| C(2)-C(3)  | 1.522(5) |
| C(2)-H(2A) | 0.9900   |
| C(2)-H(2B) | 0.9900   |
| C(3)-H(3A) | 0.9900   |
| C(3)-H(3B) | 0.9900   |
| C(4)-C(13) | 1.404(4) |
| C(4)-C(5)  | 1.413(4) |
| C(5)-C(6)  | 1.387(4) |
| C(5)-C(11) | 1.498(4) |
| C(6)-C(7)  | 1.398(4) |
| C(6)-H(6)  | 0.9500   |
| C(7)-C(8)  | 1.393(5) |
| C(7)-H(7)  | 0.9500   |
| C(8)-C(9)  | 1.382(5) |
| C(8)-H(8)  | 0.9500   |
| C(9)-C(10) | 1.395(4) |
| C(9)-H(9)  | 0.9500   |



|             |          |
|-------------|----------|
| C(10)-C(11) | 1.382(5) |
| C(10)-H(10) | 0.9500   |
| C(11)-C(12) | 1.406(4) |
| C(12)-C(13) | 1.385(5) |
| C(12)-H(12) | 0.9500   |
| C(13)-H(13) | 0.9500   |

**Table S4.** Bond angles [°] for **3**.

|                  |            |                   |          |
|------------------|------------|-------------------|----------|
| C(3)-S(1)-C(1)   | 93.36(17)  | C(4)-C(5)-C(11)   | 106.0(3) |
| C(2)-S(2)-C(1)   | 98.12(15)  | C(5)-C(6)-C(7)    | 128.5(3) |
| C(4)-C(1)-S(1)   | 111.1(2)   | C(5)-C(6)-H(6)    | 115.7    |
| C(4)-C(1)-S(2)   | 111.8(2)   | C(7)-C(6)-H(6)    | 115.7    |
| S(1)-C(1)-S(2)   | 106.30(15) | C(8)-C(7)-C(6)    | 129.1(3) |
| C(4)-C(1)-H(1)   | 109.2      | C(8)-C(7)-H(7)    | 115.5    |
| S(1)-C(1)-H(1)   | 109.2      | C(6)-C(7)-H(7)    | 115.5    |
| S(2)-C(1)-H(1)   | 109.2      | C(9)-C(8)-C(7)    | 130.1(3) |
| C(3)-C(2)-S(2)   | 108.9(2)   | C(9)-C(8)-H(8)    | 115.0    |
| C(3)-C(2)-H(2A)  | 109.9      | C(7)-C(8)-H(8)    | 115.0    |
| S(2)-C(2)-H(2A)  | 109.9      | C(8)-C(9)-C(10)   | 128.5(3) |
| C(3)-C(2)-H(2B)  | 109.9      | C(8)-C(9)-H(9)    | 115.8    |
| S(2)-C(2)-H(2B)  | 109.9      | C(10)-C(9)-H(9)   | 115.8    |
| H(2A)-C(2)-H(2B) | 108.3      | C(11)-C(10)-C(9)  | 128.8(3) |
| C(2)-C(3)-S(1)   | 107.3(2)   | C(11)-C(10)-H(10) | 115.6    |
| C(2)-C(3)-H(3A)  | 110.3      | C(9)-C(10)-H(10)  | 115.6    |
| S(1)-C(3)-H(3A)  | 110.3      | C(10)-C(11)-C(12) | 125.3(3) |
| C(2)-C(3)-H(3B)  | 110.3      | C(10)-C(11)-C(5)  | 128.1(3) |
| S(1)-C(3)-H(3B)  | 110.3      | C(12)-C(11)-C(5)  | 106.6(3) |
| H(3A)-C(3)-H(3B) | 108.5      | C(13)-C(12)-C(11) | 108.8(3) |
| C(13)-C(4)-C(5)  | 108.3(3)   | C(13)-C(12)-H(12) | 125.6    |
| C(13)-C(4)-C(1)  | 125.0(3)   | C(11)-C(12)-H(12) | 125.6    |
| C(5)-C(4)-C(1)   | 126.6(3)   | C(12)-C(13)-C(4)  | 110.3(3) |
| C(6)-C(5)-C(4)   | 127.1(3)   | C(12)-C(13)-H(13) | 124.8    |
| C(6)-C(5)-C(11)  | 126.9(3)   | C(4)-C(13)-H(13)  | 124.8    |

**Table S5.** Anisotropic displacement parameters ( $\text{\AA}^2 \times 10^3$ ) for **3**. The anisotropic displacement factor exponent takes the form:  $-2\pi^2 [ h^2 a^{*2} U^{11} + \dots + 2 h k a^* b^* U^{12} ]$

|      | U <sup>11</sup> | U <sup>22</sup> | U <sup>33</sup> | U <sup>23</sup> | U <sup>13</sup> | U <sup>12</sup> |
|------|-----------------|-----------------|-----------------|-----------------|-----------------|-----------------|
| S(1) | 29(1)           | 23(1)           | 18(1)           | 0(1)            | 7(1)            | -2(1)           |
| S(2) | 51(1)           | 28(1)           | 26(1)           | -6(1)           | 6(1)            | -14(1)          |
| C(1) | 26(1)           | 22(2)           | 16(1)           | -1(1)           | 3(1)            | 1(1)            |
| C(2) | 38(2)           | 39(2)           | 19(2)           | -7(1)           | 2(1)            | 0(2)            |
| C(3) | 38(2)           | 40(2)           | 19(1)           | -6(1)           | 10(1)           | -1(2)           |
| C(4) | 24(1)           | 16(1)           | 19(1)           | 3(1)            | 5(1)            | -2(1)           |
| C(5) | 20(1)           | 13(1)           | 18(1)           | 1(1)            | 6(1)            | -3(1)           |
| C(6) | 21(1)           | 16(1)           | 21(1)           | 0(1)            | 6(1)            | -1(1)           |
| C(7) | 21(1)           | 20(1)           | 22(2)           | 2(1)            | 1(1)            | -2(1)           |

|       |       |       |       |       |       |       |
|-------|-------|-------|-------|-------|-------|-------|
| C(8)  | 31(2) | 21(2) | 19(1) | 0(1)  | 0(1)  | -5(1) |
| C(9)  | 39(2) | 22(2) | 18(1) | -3(1) | 11(1) | -5(1) |
| C(10) | 28(1) | 17(1) | 27(1) | 1(1)  | 12(1) | -1(1) |
| C(11) | 20(1) | 15(2) | 25(1) | 2(1)  | 7(1)  | -2(1) |
| C(12) | 20(1) | 23(2) | 29(2) | 5(1)  | 9(1)  | 1(1)  |
| C(13) | 22(1) | 27(2) | 24(2) | 6(1)  | 2(1)  | 0(1)  |

**Table S6.** Hydrogen coordinates ( $\times 10^4$ ) and isotropic displacement parameters ( $\text{\AA}^2 \times 10^{-3}$ ) for **3**.

|       | x     | y    | z     | U(eq) |
|-------|-------|------|-------|-------|
| H(1)  | 578   | 5762 | 7462  | 25    |
| H(2A) | 4378  | 5287 | 10562 | 39    |
| H(2B) | 2762  | 6923 | 10576 | 39    |
| H(3A) | -376  | 5475 | 9599  | 38    |
| H(3B) | 865   | 4079 | 10499 | 38    |
| H(6)  | -643  | 5759 | 5655  | 23    |
| H(7)  | -2134 | 5758 | 3813  | 26    |
| H(8)  | -726  | 4719 | 2404  | 29    |
| H(9)  | 2505  | 3401 | 2431  | 31    |
| H(10) | 5258  | 2814 | 3906  | 28    |
| H(12) | 7239  | 2731 | 6017  | 28    |
| H(13) | 6308  | 3651 | 7838  | 29    |

**Table S7.** Torsion angles [ $^\circ$ ] for **3**.

|                       |            |
|-----------------------|------------|
| C(3)-S(1)-C(1)-C(4)   | 161.3(2)   |
| C(3)-S(1)-C(1)-S(2)   | 39.38(17)  |
| C(2)-S(2)-C(1)-C(4)   | -140.4(2)  |
| C(2)-S(2)-C(1)-S(1)   | -18.97(19) |
| C(1)-S(2)-C(2)-C(3)   | -14.1(3)   |
| S(2)-C(2)-C(3)-S(1)   | 43.2(3)    |
| C(1)-S(1)-C(3)-C(2)   | -51.2(3)   |
| S(1)-C(1)-C(4)-C(13)  | -63.8(4)   |
| S(2)-C(1)-C(4)-C(13)  | 54.9(4)    |
| S(1)-C(1)-C(4)-C(5)   | 111.7(3)   |
| S(2)-C(1)-C(4)-C(5)   | -129.6(3)  |
| C(13)-C(4)-C(5)-C(6)  | -178.9(3)  |
| C(1)-C(4)-C(5)-C(6)   | 4.9(5)     |
| C(13)-C(4)-C(5)-C(11) | 0.5(3)     |
| C(1)-C(4)-C(5)-C(11)  | -175.7(3)  |
| C(4)-C(5)-C(6)-C(7)   | -179.3(3)  |
| C(11)-C(5)-C(6)-C(7)  | 1.4(5)     |
| C(5)-C(6)-C(7)-C(8)   | -0.2(6)    |
| C(6)-C(7)-C(8)-C(9)   | -0.1(6)    |
| C(7)-C(8)-C(9)-C(10)  | -0.7(6)    |
| C(8)-C(9)-C(10)-C(11) | 0.7(6)     |

|                         |           |
|-------------------------|-----------|
| C(9)-C(10)-C(11)-C(12)  | 179.7(3)  |
| C(9)-C(10)-C(11)-C(5)   | 0.6(6)    |
| C(6)-C(5)-C(11)-C(10)   | -1.8(5)   |
| C(4)-C(5)-C(11)-C(10)   | 178.8(3)  |
| C(6)-C(5)-C(11)-C(12)   | 179.0(3)  |
| C(4)-C(5)-C(11)-C(12)   | -0.4(3)   |
| C(10)-C(11)-C(12)-C(13) | -179.0(3) |
| C(5)-C(11)-C(12)-C(13)  | 0.2(4)    |
| C(11)-C(12)-C(13)-C(4)  | 0.1(4)    |
| C(5)-C(4)-C(13)-C(12)   | -0.3(4)   |
| C(1)-C(4)-C(13)-C(12)   | 175.9(3)  |

---

## **References**

<sup>1</sup> (a) K. Hafner and C. Bernhard, *Justus Liebigs Ann. Chem.*, 1959, **625**, 108. (b) W. Treibs, H.-J. Neupert and J. Hiebsch, *Chem. Ber.*, 1959, **92**, 141.

<sup>2</sup> Analytical Methods Committee, *Analyst*, 1987, **112**, 199.
